# Supplementary material for: Population dynamics of an Escherichia coli ST131 lineage during recurrent urinary tract infection
Source: PubMed Central journal article supplement (PMC6692316; doi:10.1038/s41467-019-11571-5), 2019-08-13
Supplement: 41467_2019_11571_MOESM1_ESM.pdf [file 41467_2019_11571_MOESM1_ESM.pdf]

## Supplementary Information

### Population dynamics of an *Escherichia coli* ST131 lineage during recurrent urinary tract infection

Brian M. Forde<sup>1,2,3</sup>, Leah W. Roberts<sup>1,2,3</sup>, Minh-Duy Phan<sup>1,3</sup>, Kate M. Peters<sup>1,3</sup>, Brittany A. Fleming<sup>4</sup>, Colin W. Russell<sup>4</sup>, Sara M. Lenherr<sup>5</sup>, Jeremy B. Myers<sup>5</sup>, Adam P. Barker<sup>6</sup>, Mark A. Fisher<sup>6</sup>, Teik-Min Chong<sup>7</sup>, Wai-Fong Yin<sup>7</sup>, Kok-Gan Chan<sup>7,8</sup>, Mark A. Schembri<sup>1,3\*</sup>, Matthew A. Mulvey<sup>4\*</sup> and Scott A. Beatson<sup>1,2,3\*</sup>

<sup>1</sup>School of Chemistry and Molecular Biosciences, The University of Queensland, Brisbane, Queensland, Australia.

<sup>2</sup>Australian Infectious Diseases Research Centre, The University of Queensland, Brisbane, Queensland, Australia.

<sup>3</sup>Australian Centre for Ecogenomics, The University of Queensland, Brisbane, Queensland, Australia.

<sup>4</sup>University of Utah School of Medicine, Department of Pathology, Division of Microbiology and Immunology, Salt Lake City, Utah, USA.

<sup>5</sup>Genitourinary Injury and Reconstructive Urology, Department of Surgery, University of Utah, Salt Lake City, Utah, USA.

<sup>6</sup>ARUP Laboratories and Department of Pathology, University of Utah, Salt Lake City, Utah, USA.

<sup>7</sup>Division of Genetics and Molecular Biology, Institute of Biological Sciences, Faculty of Science, University of Malaya, Kuala Lumpur, Malaysia.

<sup>8</sup>International Genome Centre, Jiangsu University, Zhenjiang, China

\* To whom correspondence should be addressed: A/Prof Scott Beatson ([s.beatson@uq.edu.au](mailto:s.beatson@uq.edu.au)), Prof Matthew Mulvey ([mulvey@path.utah.edu](mailto:mulvey@path.utah.edu)) and Prof Mark Schembri ([m.schembri@uq.edu.au](mailto:m.schembri@uq.edu.au)).

## **Supplementary Methods**

### **Detection of DNA modifications**

The detection of epigenetic signatures was carried out using the RS\_Modification and Motif Analysis.1 tool from the SMRT analysis package version 2.3.0. In brief, PacBio reads were mapped to the genomes of U12A, U13A, U14A and U15A. Interpulse durations (IPDs)<sup>1</sup> for each base were measured against an *in silico* kinetic reference model to determine their methylation status ([http://www.pacb.com/wp-content/uploads/2015/09/WP\\_Detecting\\_DNA\\_Base\\_Modifications\\_Using\\_SMRT\\_Sequencing.pdf](http://www.pacb.com/wp-content/uploads/2015/09/WP_Detecting_DNA_Base_Modifications_Using_SMRT_Sequencing.pdf)). Sequence motifs were identified using Motif finder v1 with default parameters.

**Supplementary Table 1: Patient #1 prescribed antibiotics 2010-2016**

| Date      | Antibiotic             | Dosage                                                    |
|-----------|------------------------|-----------------------------------------------------------|
| Dec 2010  | Ceftriaxone            | –                                                         |
| Jan 2011  | Pyrazinamide           | 1 g 4X per day for 14 days                                |
| Feb 2011  | Augmentin              | 500 mg Po BID for 14 days                                 |
| Mar 2011  | Cefedime               | 500 mg PO BID for 14 days                                 |
| May 2011  | Macrobid               | 100 mg for 14 days                                        |
| Jun 2011  | Zyvox                  | 600 mg for 14 days, every 12 hrs                          |
| Jul 2011  | Macrobid               | 100 mg for 28 days                                        |
| Oct 2011  | Nitrofuantoin/Macrobid | –                                                         |
| Apr 2012  | Ertapenum              | PICC line, 21 days; patient was free of UTI for ~9 months |
| Mar 2013  | Nitrofuantoin          | 100 mg                                                    |
| Jul 2013  | Ertapenem              | –                                                         |
| Sept 2013 | Ertapenem              | 7 days                                                    |
| Sept 2013 | Levaquin               | 7 days                                                    |
| Sept 2013 | Meropenem              | –                                                         |
| Sept 2013 | Cefepime               | –                                                         |
| Sept 2013 | Meropenem              | 1 g                                                       |
| Nov 2013  | Zyvox                  | 600 mg for 10 days                                        |
| Nov 2013  | Levaquin               | 750 mg for 14 days                                        |
| Nov 2013  | Amoxicillin            | 500 mg for 7 days                                         |
| Nov 2013  | Recephin               | 1 g for 2 days                                            |
| Nov 2013  | Rosephin               | 14 days                                                   |
| Nov 2013  | Amoxicillin            | 500 mg for 10 days                                        |
| Jan 2014  | Ceftriaxone            | –                                                         |
| Jan 2014  | Nitrofurantoin         | 100 mg for 7 days                                         |
| Mar 2014  | Ciprofloxacin          | 500 mg                                                    |
| Apr 2014  | Ciprofloxacin          | 10 days                                                   |
| Oct 2014  | Ertapenem              | 1 g for 14 days                                           |
| Feb 2015  | Bactrim DS             | –                                                         |
| Mar 2015  | Ciprofloxacin          | 500 mg for 14 days                                        |
| Apr 2015  | Nitrofurantoin         | 100 mg                                                    |
| Apr 2015  | Ertapenem              | 1 g for 10 days                                           |

|          |          |                    |
|----------|----------|--------------------|
| May 2016 | Levaquin | –                  |
| Jun 2016 | Macrobid | –                  |
| Nov 2016 | Macrobid | 100 mg for 10 days |

**Supplementary Table 2: Antibiograms of U12A, U13A, U14A, U15A and U15B**

| Strain | Amikacin    | Amoxicillin-Clavulanate | Ampicillin  | Aztreonam   | Cefazolin   | Cefepime    | Ceftazidime | Ceftriaxone | Cefuroxime  | Ciprofloxacin | Gentamicin  | Imipenem    | Levofloxacin | Meropenem   | Moxifloxacin | Nitrofurantoin | Piperacillin-Tazobactam | Tobramycin   | Trimethoprim-Sulfamethoxazole |
|--------|-------------|-------------------------|-------------|-------------|-------------|-------------|-------------|-------------|-------------|---------------|-------------|-------------|--------------|-------------|--------------|----------------|-------------------------|--------------|-------------------------------|
| U12A   | Susceptible | Intermediate            | Resistant   | Susceptible | Resistant   | Susceptible | Susceptible | Susceptible | Susceptible | Resistant     | Susceptible | Susceptible | Resistant    | Susceptible | Resistant    | Susceptible    | Susceptible             | Resistant    | Resistant                     |
| U13A   | Susceptible | Susceptible             | Resistant   | Susceptible | Susceptible | Susceptible | Susceptible | Susceptible | Susceptible | Resistant     | Susceptible | Susceptible | Resistant    | Susceptible | Resistant    | Susceptible    | Susceptible             | Susceptible  | Resistant                     |
| U14A   | Susceptible | Susceptible             | Resistant   | Susceptible | Resistant   | Susceptible | Susceptible | Susceptible | Susceptible | Resistant     | Susceptible | Susceptible | Resistant    | Susceptible | Resistant    | Resistant      | Susceptible             | Susceptible  | Resistant                     |
| U15A   | Susceptible | Susceptible             | Susceptible | Susceptible | Susceptible | Susceptible | Susceptible | Susceptible | Susceptible | Resistant     | Resistant   | Susceptible | Resistant    | Susceptible | Resistant    | Susceptible    | Susceptible             | Intermediate | Resistant                     |
| U15B   | Susceptible | Susceptible             | Susceptible | Susceptible | Susceptible | Susceptible | Susceptible | Susceptible | Susceptible | Resistant     | Susceptible | Susceptible | Resistant    | Susceptible | Resistant    | Susceptible    | Susceptible             | Susceptible  | Susceptible                   |

|              |
|--------------|
| Susceptible  |
| Intermediate |
| Resistant    |

**Supplementary Table 3: Comparison of IS insertions in the genomes of U12A, U13A, U14A and U15A**

| Ref* | Start   | Stop    | IS            | U12A | U13A | U14A | U15A |
|------|---------|---------|---------------|------|------|------|------|
| U13A | 685666  | 686418  | IS1           | █    |      |      | █    |
| U13A | 1196187 | 1196956 | IS1           |      |      |      |      |
| U13A | 1358046 | 1360577 | ISEc23        |      |      |      |      |
| U13A | 1372391 | 1372857 | IS21-family-p |      |      |      |      |
| U13A | 1373334 | 1374564 | ISEc24        |      |      |      |      |
| U13A | 1418388 | 1419667 | IS4-p         |      |      |      |      |
| U13A | 1481006 | 1483586 | ISEc12        |      |      |      |      |
| U13A | 1533395 | 1534187 | IS1           | █    | █    |      |      |
| U13A | 1648576 | 1649867 | ISEc1-p       |      |      |      |      |
| U13A | 1786973 | 1787630 | IS1           |      | █    |      |      |
| U13A | 1998603 | 2000020 | IS1397        |      |      |      |      |
| U13A | 2104805 | 2105756 | IS609-p       |      |      |      |      |
| U13A | 2136388 | 2137819 | IS1397        |      |      |      |      |
| U13A | 2192101 | 2194632 | ISEc23        |      |      |      |      |
| U13A | 2206314 | 2208035 | ISEc38        |      |      |      |      |
| U13A | 2211127 | 2212586 | ISEc20        |      |      |      |      |
| U13A | 2214613 | 2216475 | IS100kyp-p    | █    |      | █    |      |
| U13A | 2230816 | 2233396 | ISEc12        |      |      |      |      |
| U13A | 2244549 | 2245257 | IS200C        |      |      |      |      |
| U13A | 2558656 | 2559376 | IS1           |      | █    |      |      |
| U13A | 2714166 | 2714934 | IS1           |      |      |      |      |
| U13A | 3071604 | 3074184 | ISEc12        |      |      |      |      |
| U13A | 3140393 | 3141642 | ISEc52        |      |      |      |      |
| U13A | 3248021 | 3248921 | IS1           |      |      |      |      |
| U13A | 3249129 | 3249896 | IS1           |      | █    |      |      |
| U13A | 3251156 | 3251923 | IS1           |      |      |      |      |
| U13A | 3254146 | 3255455 | IS1203        |      |      |      |      |
| U13A | 3256113 | 3256887 | ISL3-family-p |      |      |      |      |
| U13A | 3273826 | 3274152 | IS600-p       |      |      |      |      |
| U13A | 3274153 | 3275373 | IS30          |      |      |      |      |
| U13A | 3275377 | 3276312 | IS600-p       |      |      |      |      |
| U13A | 3276922 | 3279442 | ISEc23        |      |      |      |      |
| U13A | 3287228 | 3288554 | IS2           |      |      |      |      |
| U13A | 3298087 | 3300079 | IS682-p       |      |      |      |      |
| U13A | 3300080 | 3301651 | IS66-family-p | █    |      | █    |      |
| U13A | 3334200 | 3335091 | IS1           |      | █    |      |      |
| U13A | 3337771 | 3338539 | IS1           |      |      |      |      |
| U13A | 3497924 | 3499173 | ISEc52        |      |      |      |      |
| U13A | 3759872 | 3761329 | IS609-p       |      |      |      |      |
| U13A | 4150036 | 4151134 | ISEc52        | █    | █    |      | █    |
| U13A | 4670901 | 4671684 | IS1           |      | █    |      |      |
| U13A | 4684448 | 4684826 | IS3-family-p  |      |      |      |      |
| U13A | 4709093 | 4710350 | IS3           |      |      |      |      |
| U13A | 4713399 | 4713616 | IS66-family-p |      |      |      |      |
| U13A | 4713617 | 4714533 | IS3-family-p  |      |      |      |      |
| U13A | 4714534 | 4714850 | IS3-family-p  |      |      |      |      |
| U13A | 4715812 | 4716576 | ISEc30        |      |      |      |      |
| U13A | 4722377 | 4723152 | IS1           |      |      |      |      |

|      |         |         |               |
|------|---------|---------|---------------|
| U13A | 4725107 | 4725878 | IS1           |
| U13A | 4726455 | 4727226 | IS1           |
| U13A | 4867810 | 4868080 | IS66-family-p |
| U13A | 4874941 | 4875256 | IS3-family-p  |
| U13A | 4877094 | 4879625 | ISEc23        |
| U13A | 4890109 | 4891373 | IS600         |
| U13A | 4891376 | 4892164 | ISEc52-p      |
| U13A | 4900839 | 4901606 | IS1           |
| U13A | 4903724 | 4906012 | ISEc8-p       |
| U13A | 4917363 | 4919943 | ISEc12        |
| U13A | 4923252 | 4925772 | ISEc23        |
| U13A | 4926930 | 4927545 | IS3-family-p  |
| U13A | 4937421 | 4938670 | ISEc52        |
| U13A | 4958850 | 4960099 | ISEc52        |
| U13A | 4966319 | 4968203 | ISEc55        |

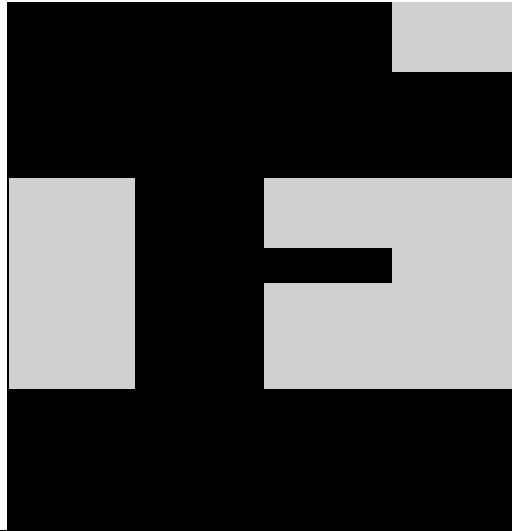

\*IS coordinates are relative to the genome of U13A.

|                                                                                   |         |
|-----------------------------------------------------------------------------------|---------|
|  | Present |
|  | Absent  |

**Supplementary Table 4: Summary of methyltransferase genes and R-M systems in the genomes of U12A, U13A, U14A and U15A<sup>##</sup>**

| Strain | Locus tag  | Type     | Mod Type | Recognition motif                                             | % mod     | nDetected | nGenome |
|--------|------------|----------|----------|---------------------------------------------------------------|-----------|-----------|---------|
| U12A   | U12A_04762 | Type I   | m6A      | AACN <sub>4</sub> CTTT/AAAGN <sub>4</sub> GTT                 | 100/100   | 893/893   | 893/893 |
|        | U12A_00296 | Type I   | m6A      | CACN <sub>4</sub> GTAY/RTACN <sub>4</sub> GTG**               | 99.8/99.7 | 740/739   | 741/741 |
|        | U12A_A0088 | Type I   | m6A      | CCAGN <sub>6</sub> RTTG/CAAYN <sub>6</sub> CTGG* <sup>#</sup> | 99.7/98.1 | 846/832   | 848/848 |
|        | U12A_04693 | Type IIS | m6A      | GAGACC*                                                       | 99.2      | 422       | 425     |
|        | U12A_03616 | Dam      | m6A      | GATC                                                          | 99        | 42126     | 42530   |
| U13A   | U13A_04807 | Type I   | m6A      | AAAGN <sub>4</sub> GTT/AACN <sub>4</sub> CTTT                 | 100/100   | 872/872   | 872/872 |
|        | U13A_00295 | Type I   | m6A      | CACN <sub>4</sub> GTAY/RTACN <sub>4</sub> GTG**               | 100/99.8  | 727/726   | 727/727 |
|        | U13A_A0085 | Type I   | m6A      | CCAGN <sub>6</sub> RTTG/CAAYN <sub>6</sub> CTGG*              | 99.5/98   | 830/818   | 834/834 |
|        | U13A_03611 | Dam      | m6A      | GATC                                                          | 99        | 41476     | 41872   |
|        | U13A_04738 | Type IIS | m6A      | GAGACC                                                        | 99        | 403       | 407     |
| U14A   | U14A_04810 | Type I   | m6A      | AACN <sub>4</sub> CTTT/AAAGN <sub>4</sub> GTT                 | 100/99.8  | 872/871   | 872/872 |
|        | U14A_00296 | Type I   | m6A      | CACN <sub>4</sub> GTAY/RTACN <sub>4</sub> GTG**               | 100/99.8  | 727/726   | 727/727 |
|        | U14A_A0089 | Type I   | m6A      | CCAGN <sub>6</sub> RTTG/CAAYN <sub>6</sub> CTGG*              | 99.5/97.7 | 830/815   | 834/834 |
|        | U14A_03614 | Dam      | m6A      | GATC                                                          | 99        | 41458     | 41872   |
|        | U14A_04741 | Type IIS | m6A      | GAGACC*                                                       | 98.7      | 402       | 407     |
| U15A   | U15A_04671 | Type I   | m6A      | AAAGN <sub>4</sub> GTT/AACN <sub>4</sub> CTTT                 | 99.8/99.2 | 854/849   | 855/855 |
|        | U15A_00295 | Type I   | m6A      | CACN <sub>4</sub> GTAY **                                     | 99.4/na   | 697/na    | 701/na  |
|        | U15A_03610 | Dam      | m6A      | GATC                                                          | 98.5      | 40474     | 41054   |

\* Absent in U15A; \*\* hemi-methylated in U15A; # CCAGN<sub>6</sub>RTTG/CAAYN<sub>6</sub>CTGG is characteristic of a type I recognition motif. Loss of the type I R-M system U12A\_A0088 in U14A, allowed us to determine its recognition motif.<sup>##</sup> All four genomes were methylated at 5'-G<sup>m6</sup>ATC-3' deoxyadenosine methylase (Dam) motifs, the frequency of which was consistent with other *E. coli* methylomes<sup>2,3</sup>. U12A, U13A and U14A carry active homologs of the EC958 type I restriction-modification (R-M) systems EcoMIII and EcoMII that target AACN<sub>4</sub>CTTT and CACN<sub>4</sub>GTAY, respectively<sup>2</sup>, and an active homolog of the type II R-M system Eco31I that targets 5'-GAG<sup>m6</sup>ACC-3' motifs<sup>4</sup>. U12A, U13A and U14A also possess an undefined type I MTase (locus tag U12A\_A0088) that is carried on the IncF plasmid pU12A-A and, based on sequence homology (BLASTn versus REBASE<sup>5</sup>), is predicted to target 5'-CCAGN<sub>6</sub>RTTG-3' motifs. In the case of U15A, despite carrying homologs of Eco31I and EcoMII, we observed no methylation of 5'-GAG<sup>m6</sup>ACC-3' motifs and only hemi-methylation of 5'-CACN<sub>4</sub>GTAY-3' motifs, suggesting that the expression of these MTases is altered in this isolate. No methylation was detected at 5'-CCAGN<sub>6</sub>RTTG-3' sites throughout the genome of U15A, consistent with the absence of the type I RM system carried by plasmid pU12A-A that is present in U12A, U13A and U14A.



**Supplementary Table 5: Primers used in this study**

| <b>Target</b>                | <b>Sequence</b>           | <b>Reference</b> |
|------------------------------|---------------------------|------------------|
| <b><i>fimB</i> insertion</b> |                           |                  |
| fimB-IS_F                    | 5'-TCCTGACCCATAGTGAAATCG  | 6                |
| fimB-IS_R                    | 5'-GCTCTATCCCAGATGCCGTA   | 6                |
|                              |                           |                  |
| <b><i>pabB</i> gene</b>      |                           |                  |
| O25pabBspe.F                 | 5'-TCCAGCAGGTGCTGGATCGT   | 7                |
| O25pabBspe.R                 | 5'-GCGAAATTTTTCGCCGTACTGT | 7                |
|                              |                           |                  |
| <b>ST-specific primers</b>   |                           |                  |
| ST73_for                     | 5'-TGGTTTTACCATTTTGTCCGA  | 8                |
| ST73_rev                     | 5'-GGAAATCGTTGATGTTGGCT   | 8                |
| ST131_for                    | 5'-GACTGCATTTTCGTCCATA    | 8                |
| ST131_rev                    | 5'-CCGGCGGCATCATAATGAAA   | 8                |
| ST95_for                     | 5'-ACTAATCAGGATGGCGAGAC   | 8                |
| ST95_rev                     | 5'-ATCACGCCCATTAATCCAGT   | 8                |
| ST69_for                     | 5'-ATCTGGAGGCAACAAGCATA   | 8                |
| ST69_rev                     | 5'-AGAGAAAGGGCGTTCAGAAT   | 8                |

(1a.)

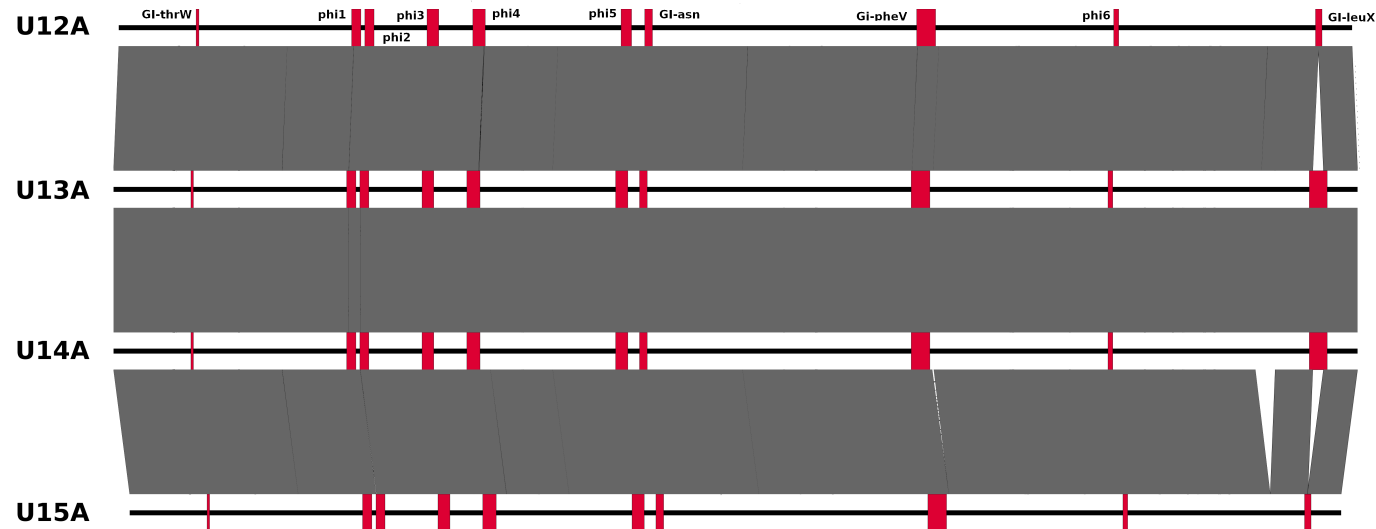

(1b.)

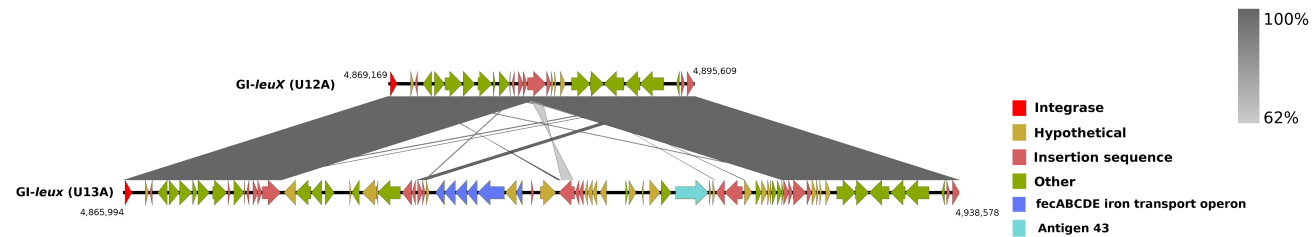

**Supplementary Figure 1: (1a)** Pairwise whole genome nucleotide comparisons (BLASTn) of 4 Patient #1 urine isolates highlighting differences in their MGEs. The large *GI-leuX* deletion is evident in U12A and U15A as is a deletion specific to U15A. **(1b)** Pairwise nucleotide comparison (BLASTn) of *GI-leuX* from U12A and U13A. Nucleotide comparisons were visualised using Easyfig.

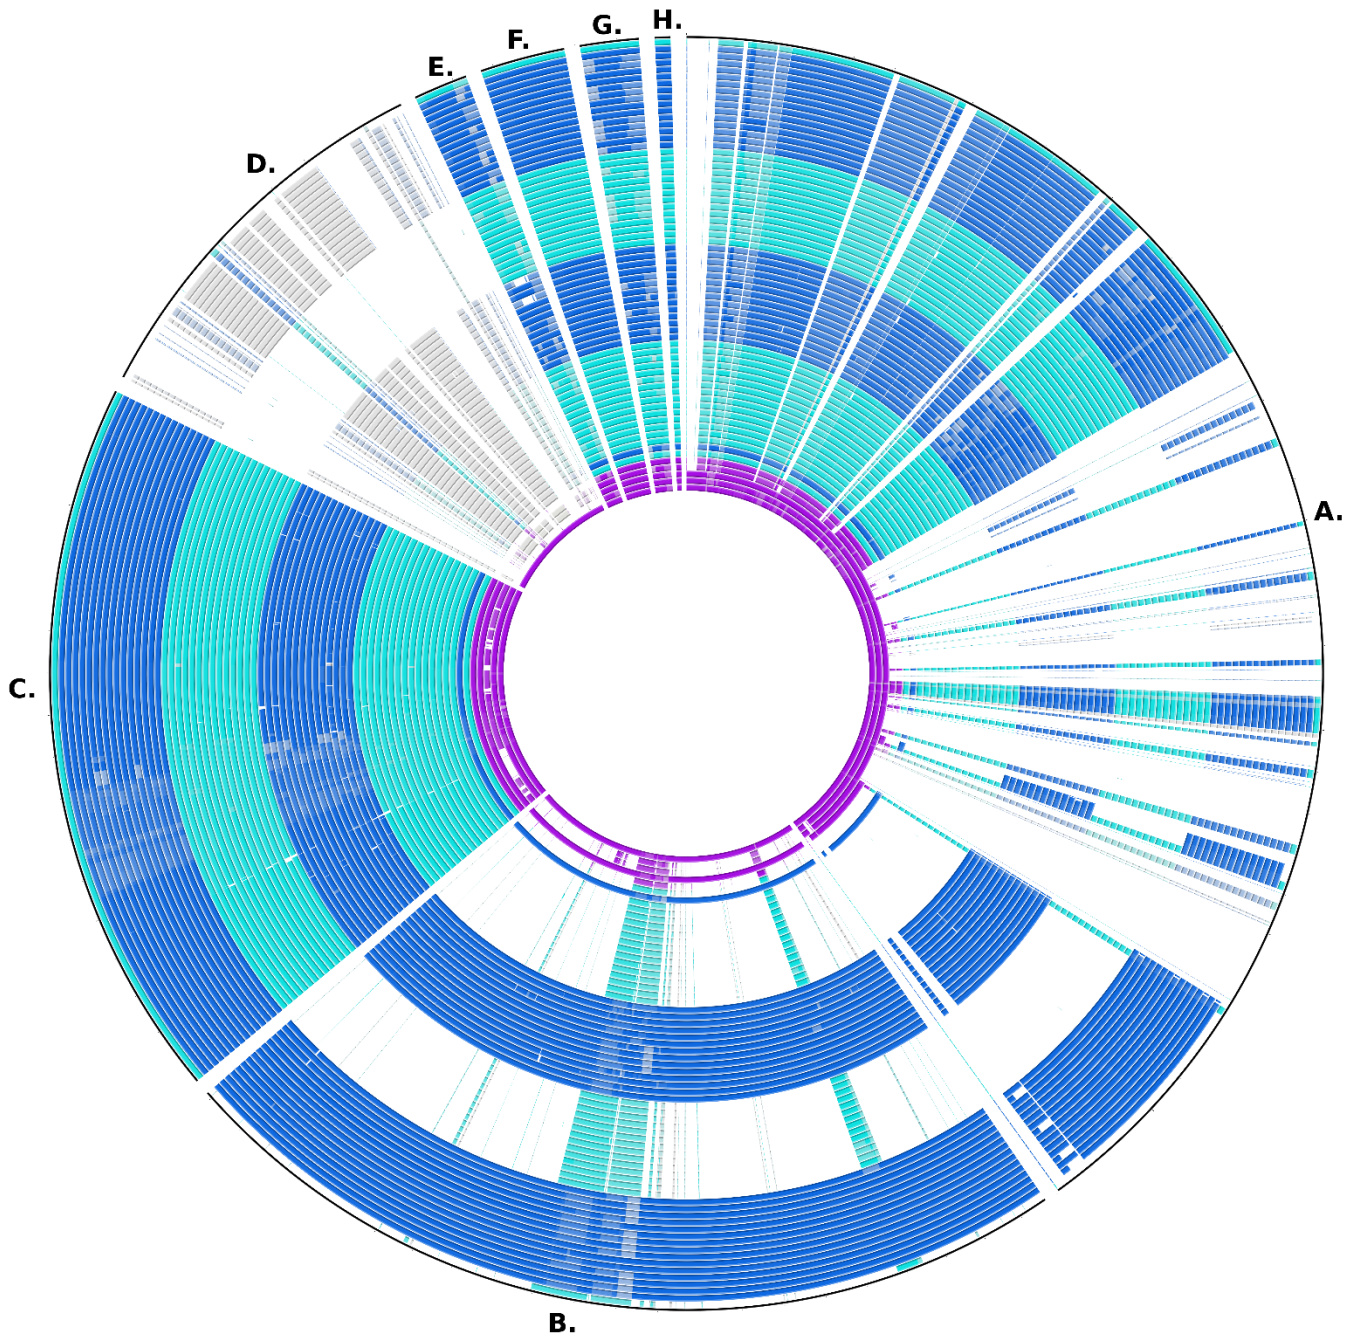

**Supplementary Figure 2:** BRIG visualisation showing the distribution of the 8 U12A plasmids among the Patient #1 isolates. Each circle displays BLASTn searches against each of the eight U12A plasmids which are labelled as follows: A=pU12A-A, B=pU12A-B, C=pU12A-C, D=pU12A-D, E=pU12A-E, F=pU12A-F, G=pU12A-G, H=pU12A-H. Patient #1 urine isolates U12A, U13A, U14A, U15A and U15B are arranged in the inner 5 purple rings (inner to outer, respectively). Patient #1 fecal isolates are arranged in the same order as Supplementary Table 6. Trimethoprim resistant (TmR) fecal isolates are coloured in blue and trimethoprim sensitive (TmS) fecal isolates in teal.

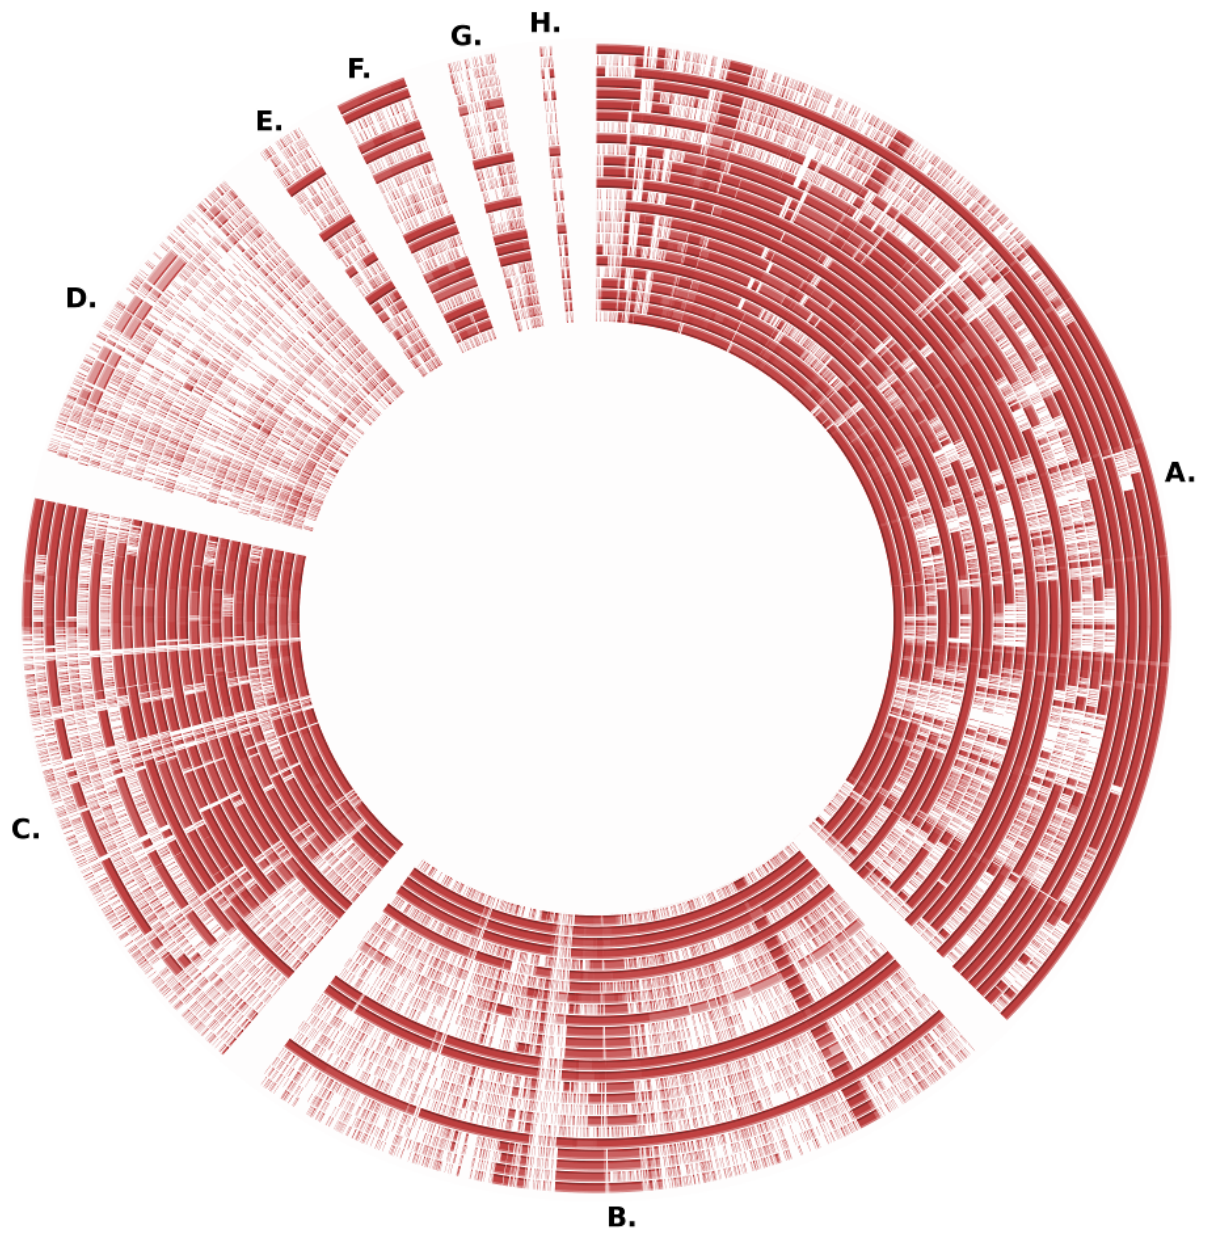

**Supplementary Figure 3:** BRIG visualisation showing the distribution of 8 U12A plasmids among the other ST131 isolates identified in this study. Each circle displays BLASTn searches against each of the eight U12A plasmids which are labelled as follows: A=pU12A-A, B=pU12A-B, C=pU12A-C, D=pU12A-D, E=pU12A-E, F=pU12A-F, G=pU12A-G, H=pU12A-H. Isolates are arranged in the same order as Supplementary Table 6.

(4a.)

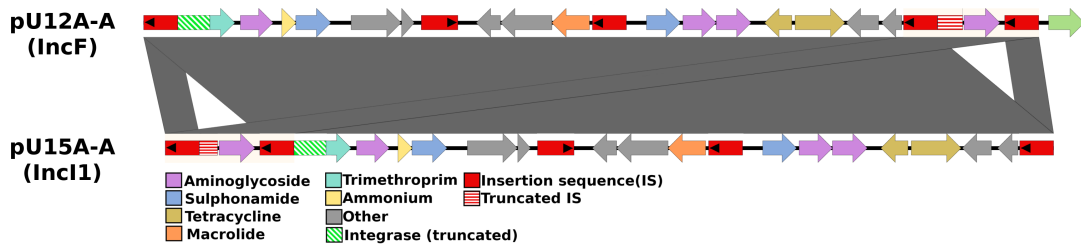

(4b.)

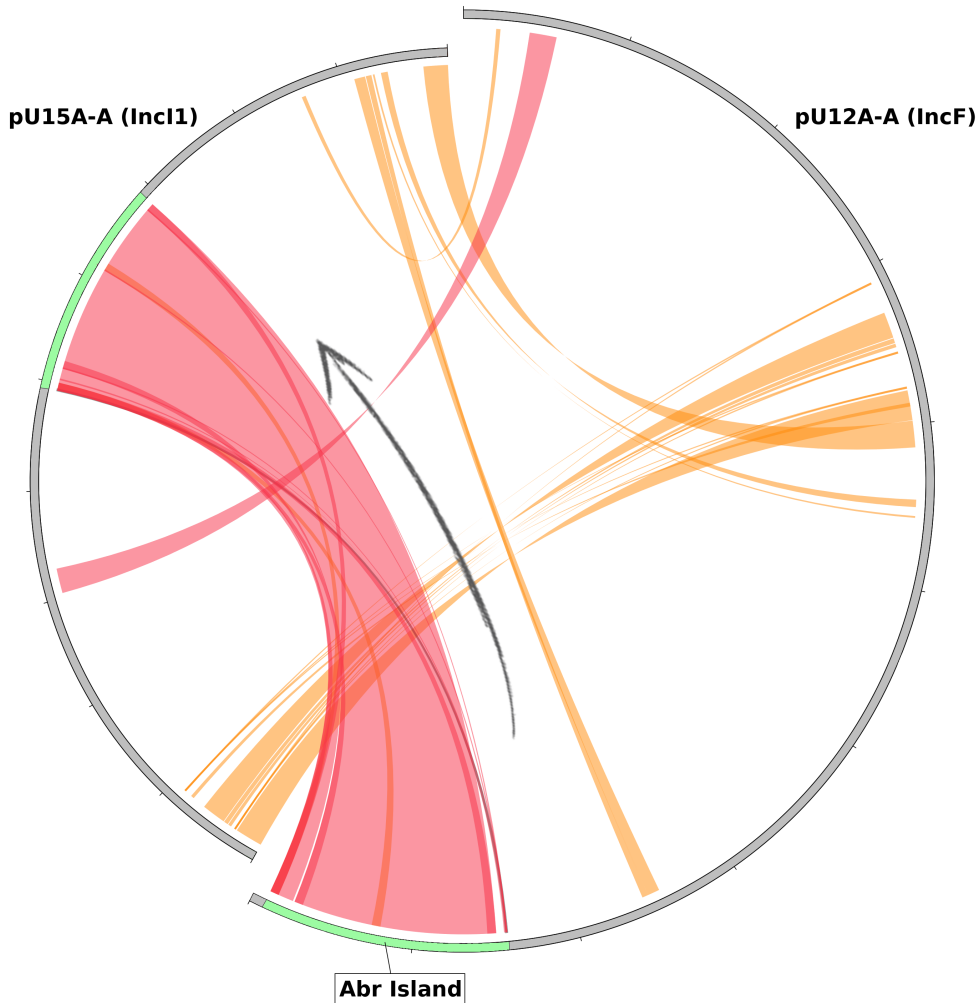

**Supplementary Figure 4: (4a)** Pairwise nucleotide comparison of antibiotic resistance islands from pU12A-A and pU15A-B. **(4b)** Pairwise whole genome nucleotide comparison (BLASTn) of the IncF plasmid pU12A-A from U12A and the IncI plasmid pU15A-B. The red ribbon represents a region of high sequence homology (>95% nucleotide sequence identity) corresponding to the resistance gene island (green) carried on pU12A-A. The arrow indicates the direction of transfer of the island from pU12A-A to pU15A-B.

## Supplementary References

- 1 Flusberg, B. A. *et al.* Direct detection of DNA methylation during single-molecule, real-time sequencing. *Nat Methods* **7**, 461-465, doi:10.1038/nmeth.1459 (2010).
- 2 Forde, B. M. *et al.* Lineage-Specific Methyltransferases Define the Methylome of the Globally Disseminated *Escherichia coli* ST131 Clone. *MBio* **6**, e01602-01615, doi:10.1128/mBio.01602-15 (2015).
- 3 Fang, G. *et al.* Genome-wide mapping of methylated adenine residues in pathogenic *Escherichia coli* using single-molecule real-time sequencing. *Nature biotechnology* **30**, 1232-1239, doi:10.1038/nbt.2432 (2012).
- 4 Bitinaite, J. *et al.* Alw26I, Eco31I and Esp3I--type IIs methyltransferases modifying cytosine and adenine in complementary strands of the target DNA. *Nucleic Acids Res* **20**, 4981-4985 (1992).
- 5 Roberts, R. J., Vincze, T., Posfai, J. & Macelis, D. REBASE--restriction enzymes and DNA methyltransferases. *Nucleic Acids Res* **33**, D230-232, doi:10.1093/nar/gki029 (2005).
- 6 Totsika, M. *et al.* Insights into a multidrug resistant *Escherichia coli* pathogen of the globally disseminated ST131 lineage: genome analysis and virulence mechanisms. *PLoS One* **6** (2011).
- 7 Clermont, O. *et al.* Rapid detection of the O25b-ST131 clone of *Escherichia coli* encompassing the CTX-M-15-producing strains. *Journal of Antimicrobial Chemotherapy* **64**, 274-277 (2009).
- 8 Doumith, M. *et al.* Rapid identification of major *Escherichia coli* sequence types causing urinary tract and bloodstream infections. *Journal of Clinical Microbiology* **53**, 160-166 (2015).
