# Supplementary material for: Population dynamics of an Escherichia coli ST131 lineage during recurrent urinary tract infection
Source: PubMed Central journal article supplement (PMC6692316; doi:10.1038/s41467-019-11571-5), 2019-08-13
Supplement: 41467_2019_11571_MOESM2_ESM.pdf [file 41467_2019_11571_MOESM2_ESM.pdf]

## **Description of Additional Supplementary Files**

File Name: Supplementary Data 1

Description: Core genome SNPs of P#1 isolates relative to the genome of E. coli U12A

File Name: Supplementary Data 2

Description: Description of clinical isolates used in this study.
